# Supplementary material for: Electrostatically regulated ternary-doped carbon foams with exposed active sites as metal-free oxygen reduction electrocatalysts
Source: Royal Society of Chemistry journal article supplement (doi:10.1039/c8nr03527j), 2018-01-01
Supplement: c8nr03527j1.pdf [file c8nr03527j1.pdf]

## Electronic Supplementary Information for

### Electrostatically regulated ternary-doped carbon foams with exposed active sites as metal-free oxygen reduction electrocatalysts

Md. Selim Arif Sher Shah,<sup>a¶</sup> Jooyoung Lee,<sup>b</sup> Ali Rauf,<sup>a</sup> Jong Hyeok Park,<sup>c</sup> Byungkwon Lim,<sup>b</sup>  
and Pil J. Yoo<sup>a,d,\*</sup>

<sup>a</sup> School of Chemical Engineering, <sup>b</sup> School of Advanced Materials Science and Engineering, and <sup>d</sup> SKKU Advanced Institute of Nanotechnology (SAINT), Sungkyunkwan University (SKKU), Suwon 16419, Republic of Korea.

<sup>c</sup> Department of Chemical and Biomolecular Engineering, Yonsei University, Seoul 03722, Republic of Korea

#### ¶ Present address

<sup>c</sup> Department of Chemical and Biomolecular Engineering, Yonsei University, Seoul 03722, Republic of Korea

Corresponding authors: E-mail: pjyoo@skku.edu and blim@skku.edu.

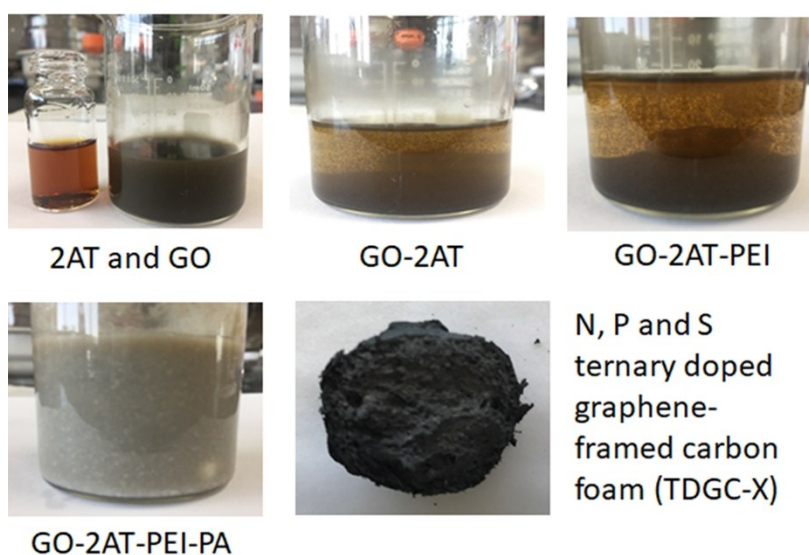

**Fig. S1** Digital images of GO and 2AT and the intermediates obtained after the addition of different precursors. It also shows the pyrolysed product.

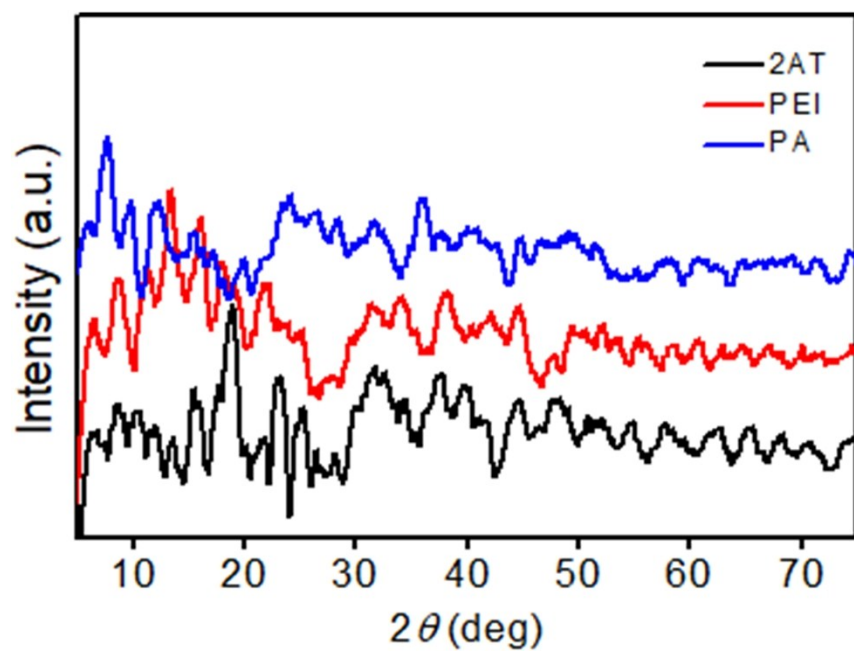

**Fig. S2** XRD patterns of 2AT, PEI, and PA

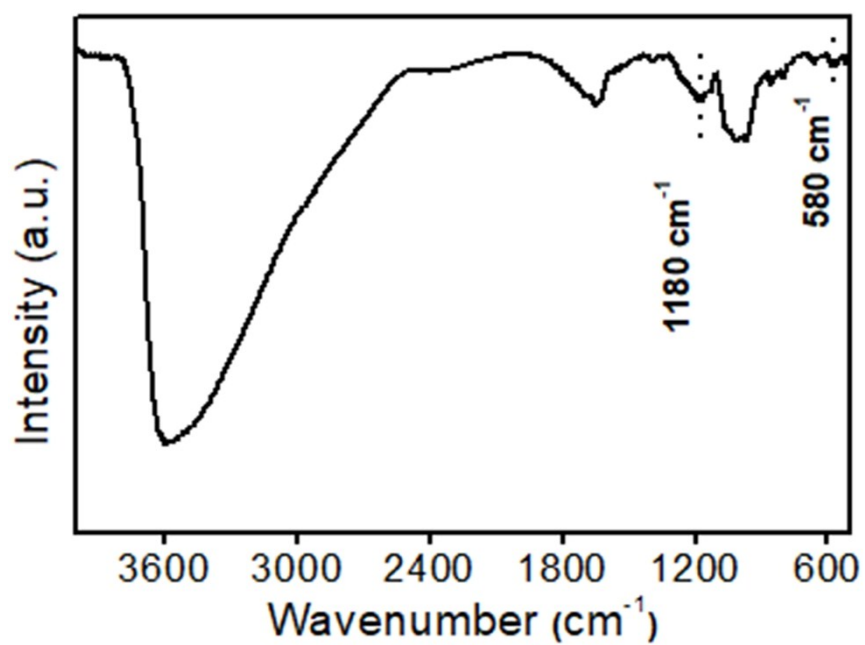

**Fig. S3** FT-IR of phytic acid (PA).

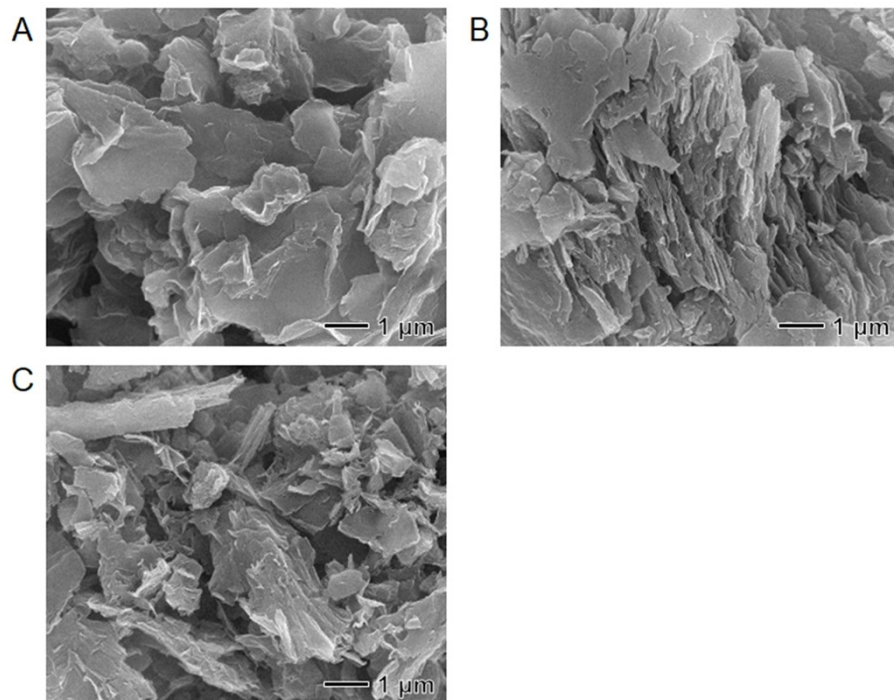

**Fig. S4** SEM images of (A) GO, (B) GO-2AT, and (C) GO-2AT-PEI.

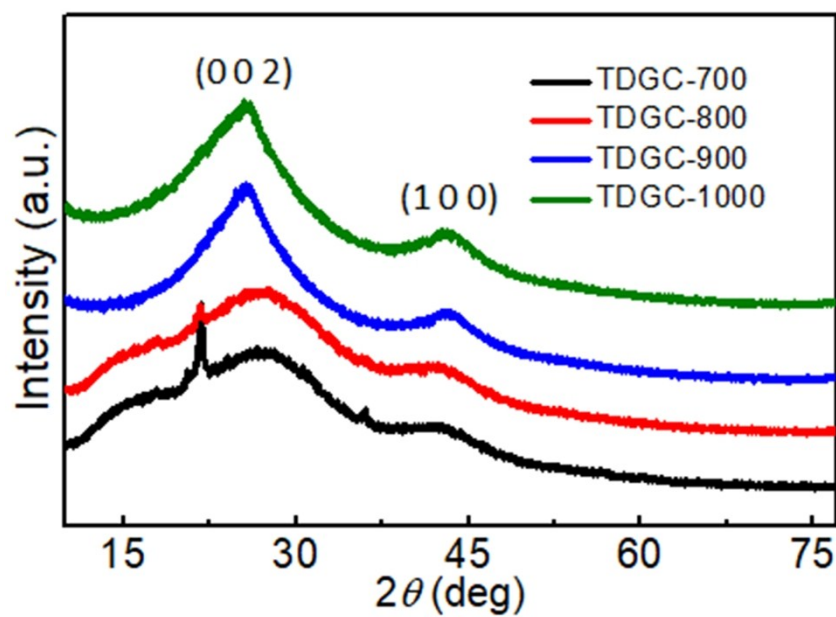

**Fig. S5** XRD patterns of TDGC-700, TDGC-800, TDGC-900, and TDGC-1000.

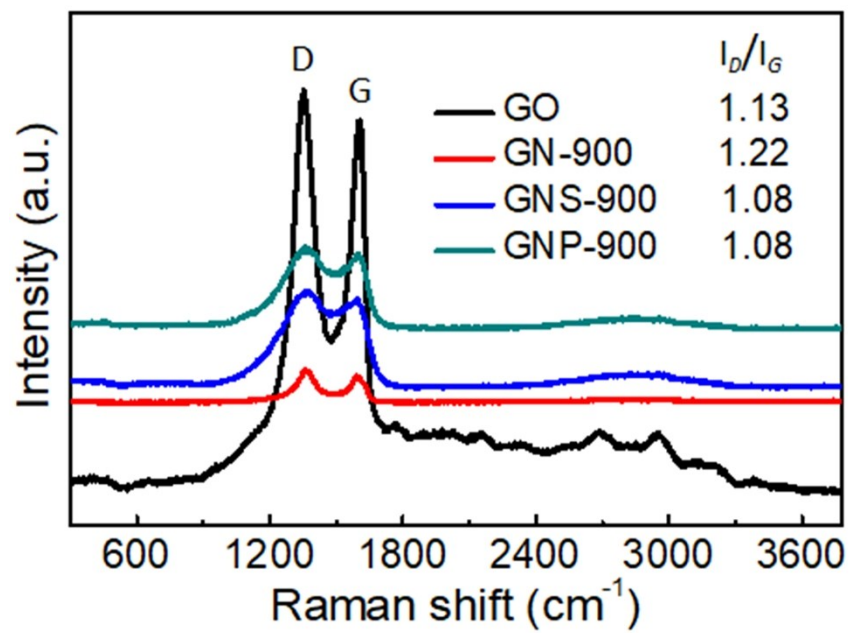

**Fig. S6** Raman spectra of GO, GN-900, GNS-900 and GNP-900.

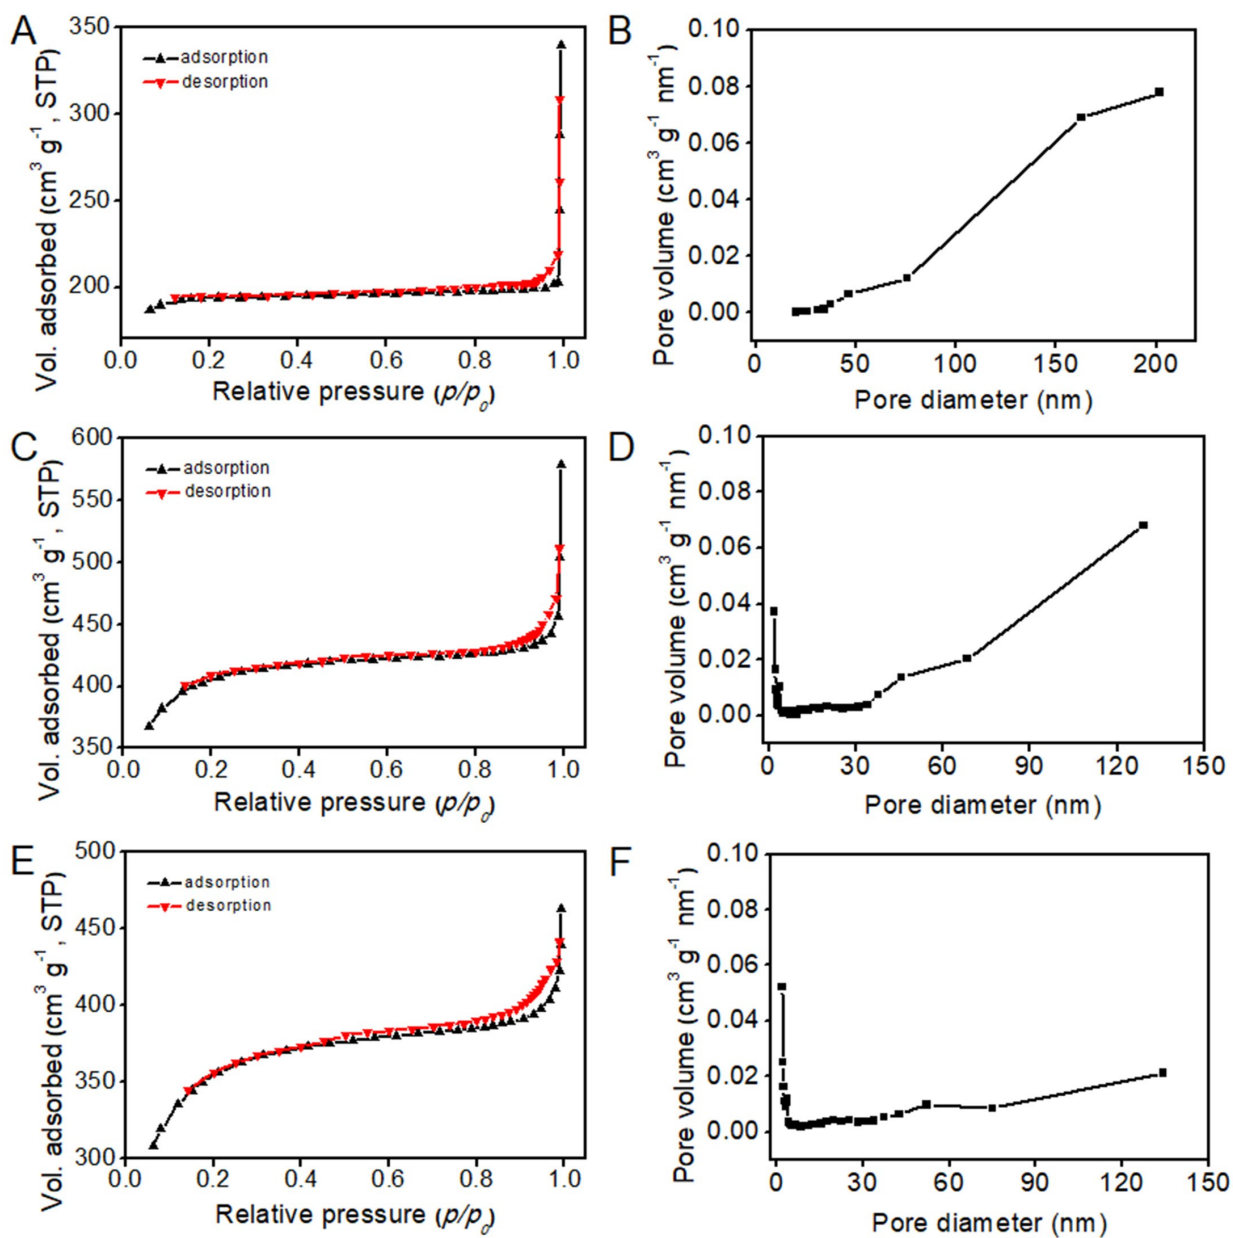

**Fig. S7** Nitrogen adsorption-desorption isotherms and pore size distribution of (A, B) TDGC-700, (C, D) TDGC-800, and (E, F) TDGC-1000.

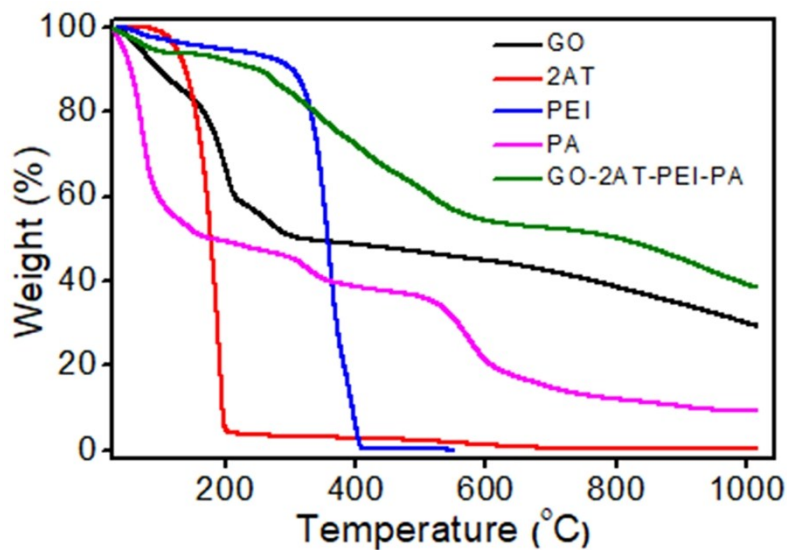

**Fig. S8** TGA traces of the GO, 2AT, PEI, PA, and GO-2AT-PEI-PA.

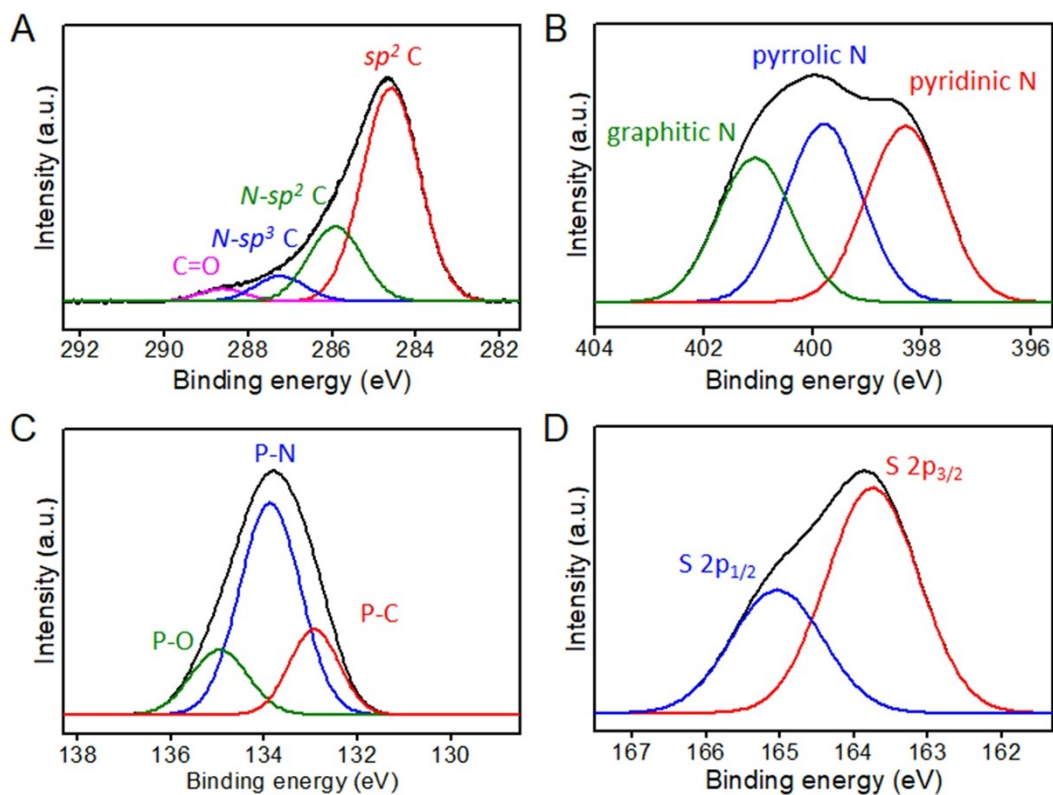

**Fig. S9** (A) C XPS 1s core level spectrum, (B) N XPS 1s core level spectrum, (C) P XPS 2p core level spectrum, and (D) S XPS 2p core level spectrum of TDGC-700.

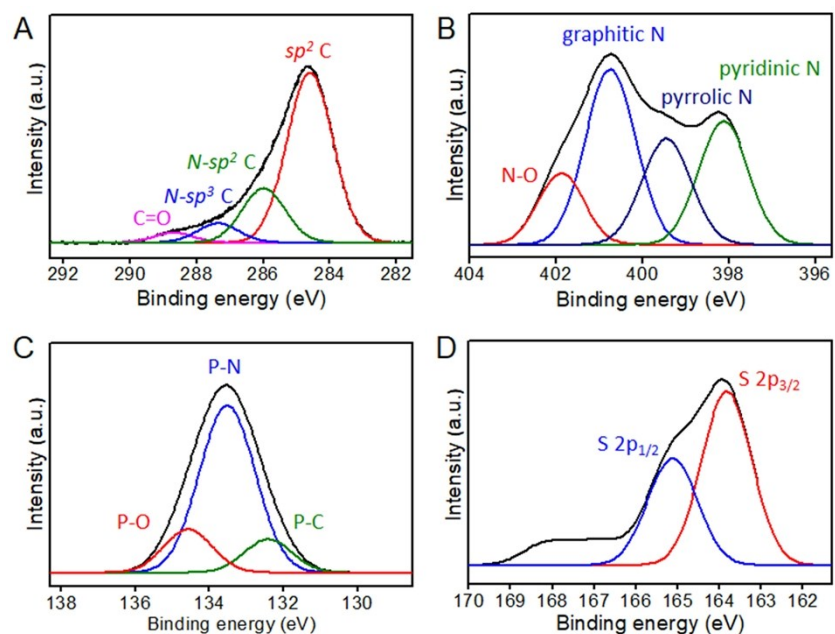

**Fig. S10** (A) C XPS 1s core level spectrum, (B) N XPS 1s core level spectrum, (C) P XPS 2p core level spectrum, and (D) S XPS 2p core level spectrum of TDGC-800.

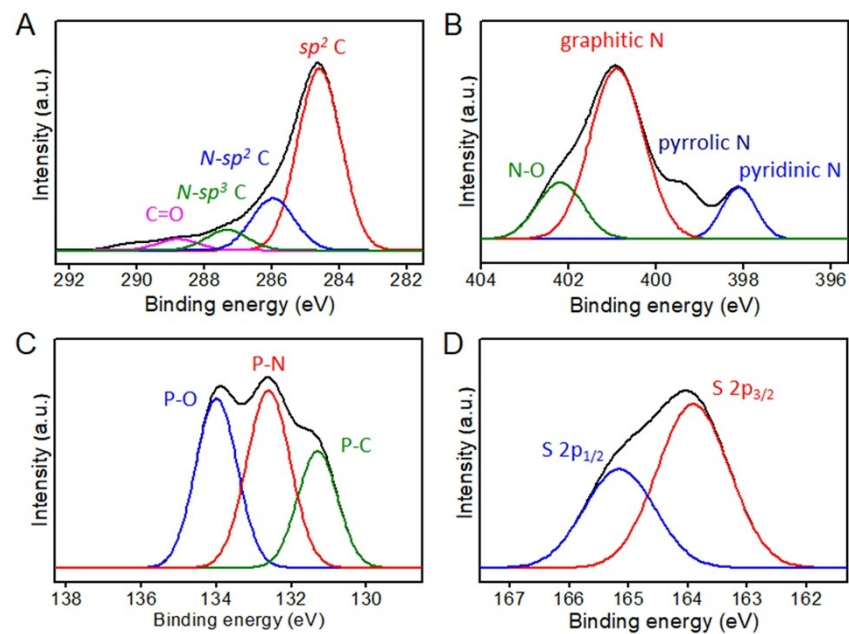

**Fig. S11** (A) C XPS 1s core level spectrum, (B) N XPS 1s core level spectrum, (C) P XPS 2p core level spectrum, and (D) S XPS 2p core level spectrum of TDGC-1000.

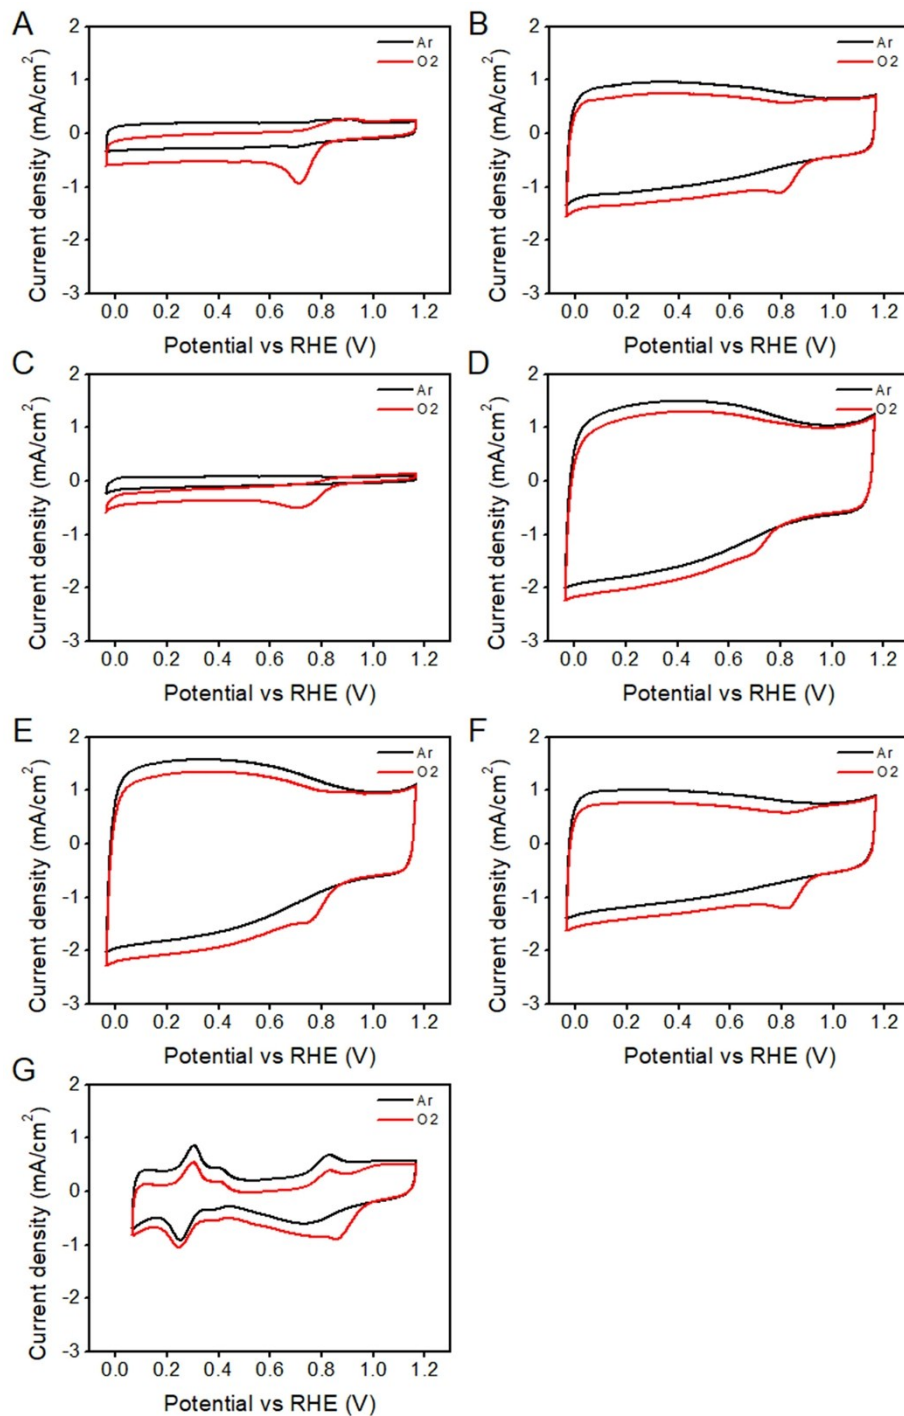

**Fig. S12** CV curves of (A) GN-900, (B) GNP-900, (C) GNS-900, (D) TDGC-700, (E) TDGC-800, (F) TDGC-1000 and (G) commercial Pt/C in Ar and O<sub>2</sub> saturated 0.1 M KOH solution.

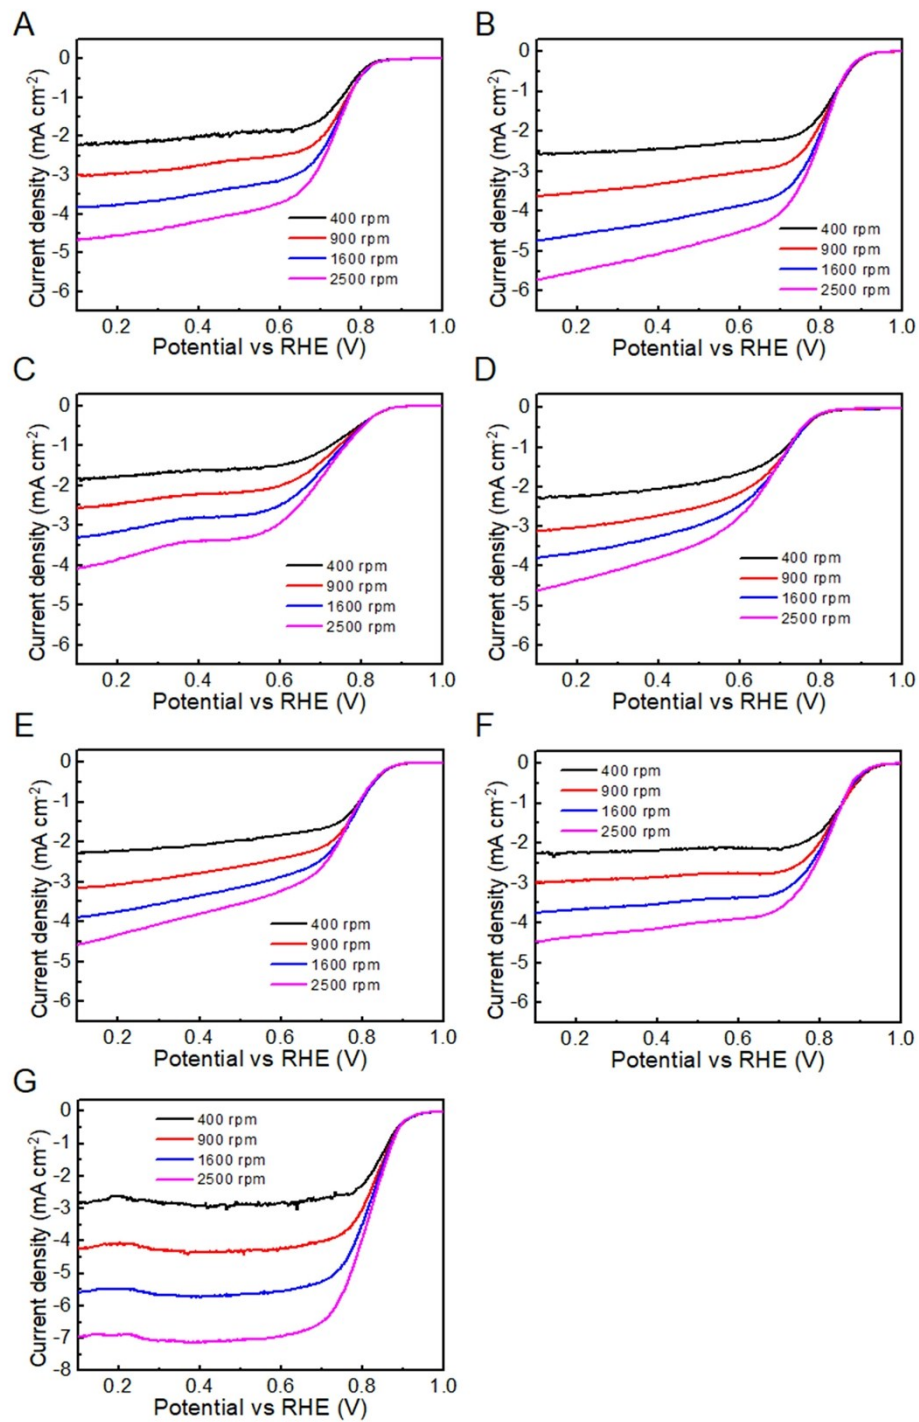

**Fig. S13** LSV curves of (A) GN-900, (B) GNP-900, (C) GNS-900, (D) TDGC-700, (E) TDGC-800, (F) TDGC-1000 and (G) commercial Pt/C in O<sub>2</sub> saturated 0.1 M KOH at various rotating speeds.

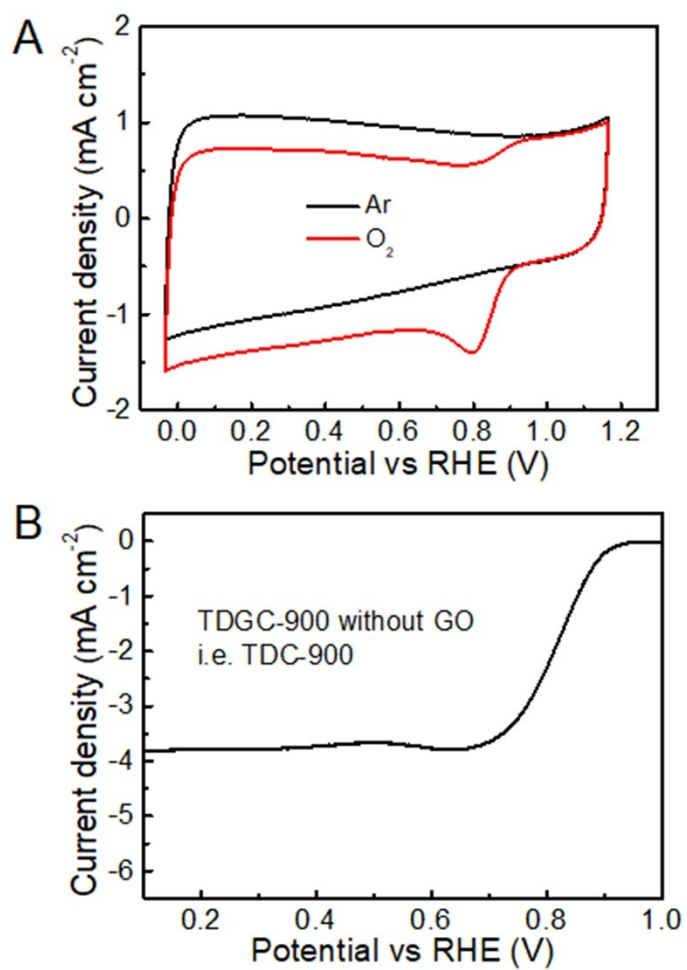

**Fig. S14** (A) CV curves in Ar and  $\text{O}_2$  saturated 0.1 M KOH solution and (B) LSV curve at an RDE (1,600 r.p.m.) in  $\text{O}_2$ -saturated 0.1 M KOH solution of TDGC-900 without GO.

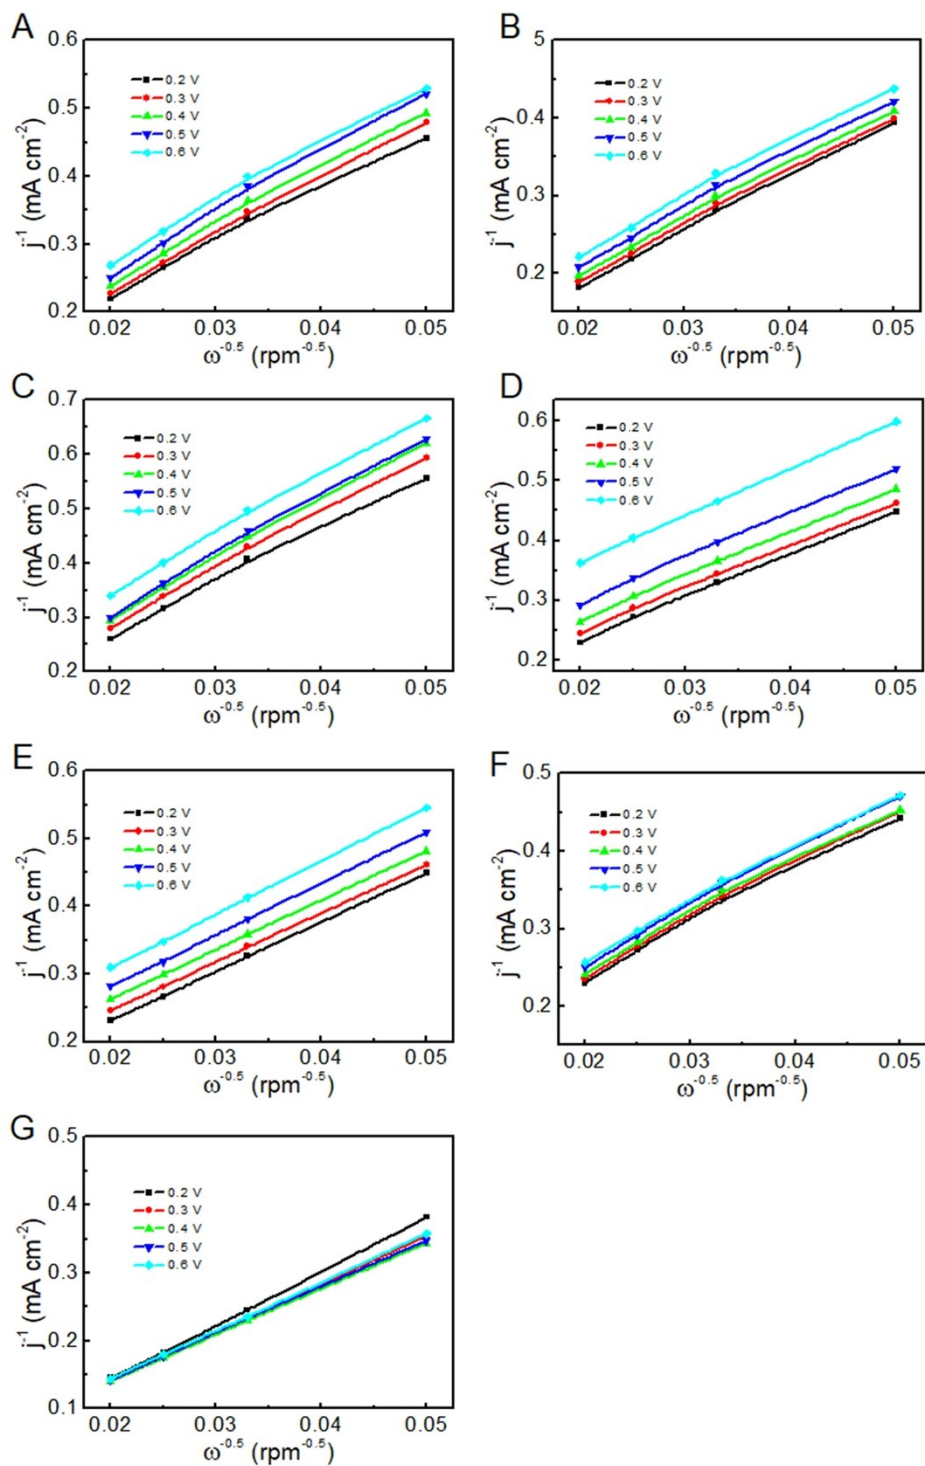

**Fig. S15** K–L plots of (A) GN-900, (B) GNP-900, (C) GNS-900, (D) TDGC-700, (E) TDGC-800, (F) TDGC-1000 and (G) commercial Pt/C at various potentials.

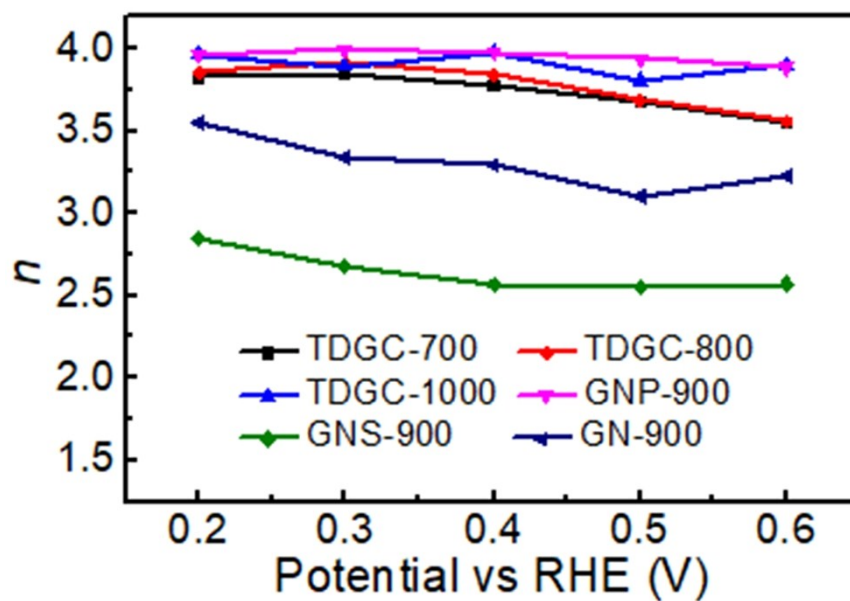

**Fig. S16** Electron transfer number of TDGC-700, TDGC-800, TDGC-1000, GNP-900, GNS-900, and GN-900 at different potentials.

**Table S1.** BET specific surface area, pore diameter and pore volume of TDGC-700, TDGC-800, TDGC-900 and TDGC-1000.

| Sample    | BET specific surface area (m <sup>2</sup> g <sup>-1</sup> ) | Pore diameter (nm) | Pore volume (cm <sup>3</sup> g <sup>-1</sup> ) |
|-----------|-------------------------------------------------------------|--------------------|------------------------------------------------|
| TDGC-700  | 636                                                         | 18, 50             | 0.31                                           |
| TDGC-800  | 925                                                         | 20, 51             | 0.71                                           |
| TDGC-900  | 1107                                                        | 5, 18, 118         | 0.87                                           |
| TDGC-1000 | 1219                                                        | 20, 55             | 0.65                                           |

**Table S2.** Oxygen reduction potential of GN-900, GNP-900, GNS-900, TDGC-700, TDGC-800, TDGC-900, TDGC-1000 and commercial Pt/C.

| Sample    | ORR potential<br>(V vs. RHE) |
|-----------|------------------------------|
| GN-900    | 0.71                         |
| GNP-900   | 0.79                         |
| GNS-900   | 0.72                         |
| TDGC-700  | 0.71                         |
| TDGC-800  | 0.75                         |
| TDGC-900  | 0.82                         |
| TDGC-1000 | 0.80                         |
| Pt/C      | 0.85                         |

**Table S3.** Quantification of different types of nitrogen in TDGC-700, TDGC-800, TDGC-900, and TDGC-1000.

| Sample    | Pyridinic N | Pyrrolic N | Graphitic N | N-oxide |
|-----------|-------------|------------|-------------|---------|
| TDGC-700  | 35.59       | 35.69      | 28.72       | -       |
| TDGC-800  | 23.30       | 21.71      | 40.37       | 14.62   |
| TDGC-900  | 20.32       | 13.38      | 50.23       | 16.07   |
| TDGC-1000 | 11.51       | 11.93      | 59.50       | 17.06   |

**Table S4.** Elemental composition of TDGC-700, TDGC-800, TDGC-900, and TDGC-1000.

| Sample    | C    | O    | N   | P   | S   |
|-----------|------|------|-----|-----|-----|
| TDGC-700  | 59.1 | 24.2 | 5.9 | 7.6 | 3.2 |
| TDGC-800  | 75.2 | 16.0 | 3.1 | 3.6 | 2.1 |
| TDGC-900  | 88.9 | 6.4  | 2.2 | 1.0 | 1.5 |
| TDGC-1000 | 93.1 | 4.0  | 1.4 | 0.3 | 1.2 |

**Table S5.** Onset and half-wave potential of GN-900, GNP-900, GNS-900, TDGC-700, TDGC-800, TDGC-900, TDGC-1000 and commercial Pt/C.

| Sample    | Potential (V vs. RHE) |           |
|-----------|-----------------------|-----------|
|           | onset                 | half-wave |
| GN-900    | 0.87                  | 0.75      |
| GNP-900   | 0.94                  | 0.81      |
| GNS-900   | 0.89                  | 0.72      |
| TDGC-700  | 0.85                  | 0.70      |
| TDGC-800  | 0.90                  | 0.77      |
| TDGC-900  | 0.97                  | 0.83      |
| TDGC-1000 | 0.97                  | 0.82      |
| Pt/C      | 0.97                  | 0.82      |
